# Supplementary material for: Evaluating Adaptive Divergence Between Migratory and Nonmigratory Ecotypes of a Salmonid Fish, Oncorhynchus mykiss
Source: PubMed Central journal article supplement (PMC3737167; doi:10.1534/g3.113.006817), 2013-08-01

## Details of GWAS methods and results

GWAS of migration/residency in two populations of *O. mykiss*

### Overview

Though population structure is completely confounded with phenotype in the Sashin Creek system, we opted to conduct a GWAS to ask the following questions: 1) how severe is the confounding, and what happens when we control for population structure using 'neutral loci' identified from population genomics approaches? and 2) since population structure is not confounded with phenotype in Little Sheep Creek, what loci are associated with the phenotype when controlling for population structure in the same way?

### Methods

A mixed model approach was used to evaluate associations between genotype and phenotype in each of the three datasets: Sashin only, Little Sheep Creek only, and the combined data set. This model included sex and population structure as co-factors, and an FDR correction ( $\alpha = 0.05$ ; BENJAMINI and YEKUTIELI 2001) was applied to account for multiple testing. To account for population structure, a principal component analysis using genotypes from all neutral markers from the output from LOSITAN on the combined dataset was performed. Principle component analysis has been shown to accurately account for structure whilst being computationally faster than using, for example, STRUCTURE (PRICE *et al.* 2006; ZHAO *et al.* 2007). Principle component analysis with the 3,801 neutral loci identified from LOSITAN from the combined dataset identified three groupings of samples: the Little Sheep Creek individuals (composed of both residents and migrants), the residents from Sashin Creek and the migrants from Sashin Creek (Figure S1). The first three axes account for 12.6, 3.3 and 2.8 % of the variation respectively and were used as fixed effects in GWAS models.

To test the effectiveness of the mixed models in removing false positives, quantile-quantile plots were constructed.

### Results and Discussion

Mixed models were used for GWAS on each of the three datasets separately for models for two different traits: 1) migration coded as a binary trait (0 = migrants, 1 = residents) and 2) fork length of the fish. Population structure was included as a fixed effect. Sex was also used as a fixed effect since migration has a well-known sex bias with females being more likely to migrate than males (DELLEFORS and FAREMO 1988; JONSSON *et al.* 1998). A total of 295 SNPs ( $p = < 0.001$ ) were significantly associated with migration in the Sashin Creek population. The strongest association between SNP genotype and migration in Sashin Creek was with SNP R41941 (FDR corrected  $p = 1.406 \times 10^{-5}$ ; Table S1). For the majority of significant associations the migrant phenotypes showed a more even distribution of genotypes between the three genotypic classes (but note that heterozygote deficits occur in several SNPs) than the resident phenotype (Table S1). The Sashin Creek fork length GWAS produced six significant SNPs. SNP R51797 produced the most significant association (FDR corrected  $p = 0.002$  Table S2). The binary trait GWAS in Little Sheep Creek samples failed to find any statistically significant SNPs (data not shown). The fork length GWAS for Little Sheep Creek produced eight significant associations. The most significant association was with SNP 49559 (FDR corrected  $p = 0.001$  Table S2). The combined binary GWAS failed to produce any significant associations, whereas the combined fork length GWAS produced 9 significant associations with the strongest being with SNP R50174 (FDR corrected  $p = 7.53 \times 10^{-4}$ ). No loci were significant in both the binary and fork length GWAS within the Sashin Creek populations. Very few significant loci were in common between the fork length GWAS analyses in the three data sets. Only R41941 was significant in both the Sashin Creek and combined datasets and only R50490 was significant in both the Little Sheep Creek and combined datasets. Mapping data showed every chromosome except Omy27 had at least one significant SNP for the binary GWAS in the Sashin Creek dataset (Figure S2a). Kernel smoothing suggests a relatively constant distribution of associations with no obvious chromosome containing a peak. However Omy6 and Omy16 seem to produce a slightly higher peak than the other chromosomes and Omy2, Omy7 and Omy10 also showing a slight increase in the kernel-smoothed average  $p$  value. The Sashin Creek fork length GWAS produced seven mapped loci that were significant (FDR corrected  $p < 0.05$ ) which were found on Omy4, Omy5, Omy10, Omy12, Omy17 and Omy21 (Figure S2b). Kernel smoothing methods showed no chromosomes with a notable peak of associations. The Little Sheep Creek fork length GWAS produced 13 mapped loci that were significant, (FDR corrected  $p < 0.05$ ) which were located on Omy1, Omy3, Omy4, Omy5, Omy7, Omy10, Omy16, and Omy26. Kernel smoothing methods showed no chromosomes with any

peaks of association (Figure S2c). Quantile-quantile plots were constructed to test for effectiveness of removing potential false positives (due to confounding with population structure) from the model. The Sashin Creek binary GWAS shows that even after correcting for population structure there is still inflation of p-values and therefore the presence of potential false positives. However, both fork length GWAS for Sashin Creek and Little Sheep Creek suggest over correction of p-values and therefore potential false negatives (Figure S3).

Comparing population genomic and association approaches. Of the 317 loci significantly associated with either the binary migratory trait or fork length, 61 were also suggestive of positive selection in *FST* outlier analysis in at least one population. A total of 55 out of 295 loci were significant in both the outlier and associations analyses within the Sashin Creek population, the remaining 6 were significant in both the Little Sheep Creek fork length GWAS and were outliers in the Sashin Creek *FST* analysis.

**Table S1** List of 20 most significant SNPs from GWAS (binary) between resident and migrants for Sashin Creek. All p-values are FDR adjusted (alpha = 0.05). The number of individuals for each of the three genotypes is also given.

| SNP ID | -log <sub>10</sub> P | migrants |     |     | residents |     |     |
|--------|----------------------|----------|-----|-----|-----------|-----|-----|
|        |                      | 1,1      | 1,2 | 2,2 | 1,1       | 1,2 | 2,2 |
| R41941 | 4.852                | 14       | 10  | 35  | 65        | 17  | 7   |
| R50379 | 4.852                | 54       | 6   | 8   | 11        | 30  | 47  |
| R19982 | 4.852                | 80       | 1   | 1   | 16        | 43  | 28  |
| R41412 | 4.852                | 59       | 6   | 5   | 7         | 40  | 41  |
| R50823 | 4.852                | 71       | 4   | 1   | 8         | 47  | 33  |
| R07776 | 4.852                | 36       | 9   | 15  | 6         | 21  | 60  |
| R23382 | 4.852                | 39       | 10  | 15  | 4         | 24  | 60  |
| R34439 | 4.852                | 6        | 6   | 53  | 53        | 27  | 7   |
| R49259 | 4.852                | 7        | 4   | 52  | 36        | 42  | 6   |
| R03501 | 4.833                | 61       | 8   | 6   | 8         | 34  | 42  |
| R23606 | 4.833                | 64       | 3   | 5   | 13        | 39  | 34  |
| R22532 | 4.814                | 58       | 2   | 5   | 12        | 34  | 39  |
| R42248 | 4.809                | 67       | 3   | 1   | 16        | 42  | 29  |
| R25897 | 4.697                | 45       | 11  | 5   | 7         | 37  | 40  |
| R48260 | 4.417                | 52       | 6   | 5   | 11        | 40  | 37  |
| R23109 | 4.332                | 50       | 6   | 5   | 21        | 38  | 24  |
| R07673 | 4.332                | 33       | 16  | 22  | 8         | 42  | 35  |
| R15784 | 4.332                | 31       | 21  | 33  | 19        | 41  | 26  |
| R31269 | 4.332                | 40       | 24  | 24  | 11        | 45  | 26  |
| R49942 | 4.332                | 45       | 11  | 11  | 22        | 45  | 19  |

**Table S2** SNPs significant for GWAS on fork length for Sashin Creek samples (above the line) and Little Sheep Creek samples (below the line) P values are adjusted with an FDR with alpha = 0.05 (according to Benjamini and Yekutieli 2001). The number of individuals for each of the three genotypes is also given.

| SNP ID | -log <sub>10</sub> P | migrants |     |     | residents |     |     |
|--------|----------------------|----------|-----|-----|-----------|-----|-----|
|        |                      | 1,1      | 1,2 | 2,2 | 1,1       | 1,2 | 2,2 |
| R51797 | 2.698                | 0        | 1   | 48  | 0         | 0   | 65  |
| R50440 | 2.384                | 40       | 10  | 19  | 25        | 37  | 18  |
| R46277 | 2.214                | 31       | 5   | 13  | 49        | 36  | 2   |
| R49907 | 1.965                | 0        | 3   | 58  | 0         | 0   | 87  |
| R50225 | 1.727                | 0        | 6   | 43  | 0         | 0   | 47  |
| R49285 | 1.313                | 0        | 4   | 48  | 0         | 5   | 60  |
| R09793 | 1.296                | 60       | 2   | 2   | 84        | 0   | 0   |
| R49559 | 2.060                | 0        | 4   | 54  | 0         | 26  | 36  |
| R21331 | 2.060                | 0        | 26  | 45  | 0         | 5   | 68  |
| R36256 | 2.060                | 24       | 17  | 7   | 7         | 18  | 25  |
| R52063 | 1.674                | 28       | 22  | 11  | 10        | 16  | 28  |
| R50490 | 1.490                | 72       | 0   | 0   | 72        | 15  | 0   |
| R32318 | 1.490                | 0        | 31  | 33  | 0         | 13  | 65  |
| R60354 | 1.490                | 0        | 11  | 74  | 0         | 0   | 99  |

**Figure S1** Two axes from a principal component analysis on: a) Sashin Creek samples, b) Little Sheep Creek samples and c) all samples.

**A.** First two axes from Principle Component Analysis on all 10921 SNPs used for GWAS analysis on fish from Sashin Creek, b) Little sheep creek and c) all samples. Steelhead samples are depicted by filled circles, rainbows by open circles. Only the first two axes were found to be significantly associated with the genotypes (axis 1  $p = <0.001$ , axis 2  $p = 0.04$ ) as determined by ANOVA tests.

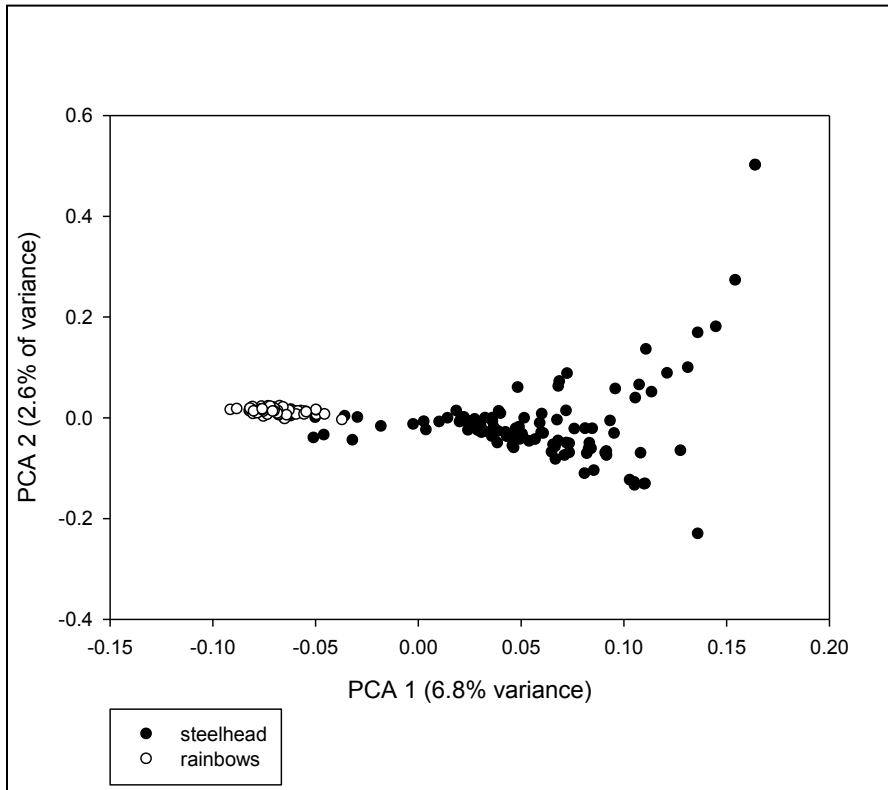

**B**

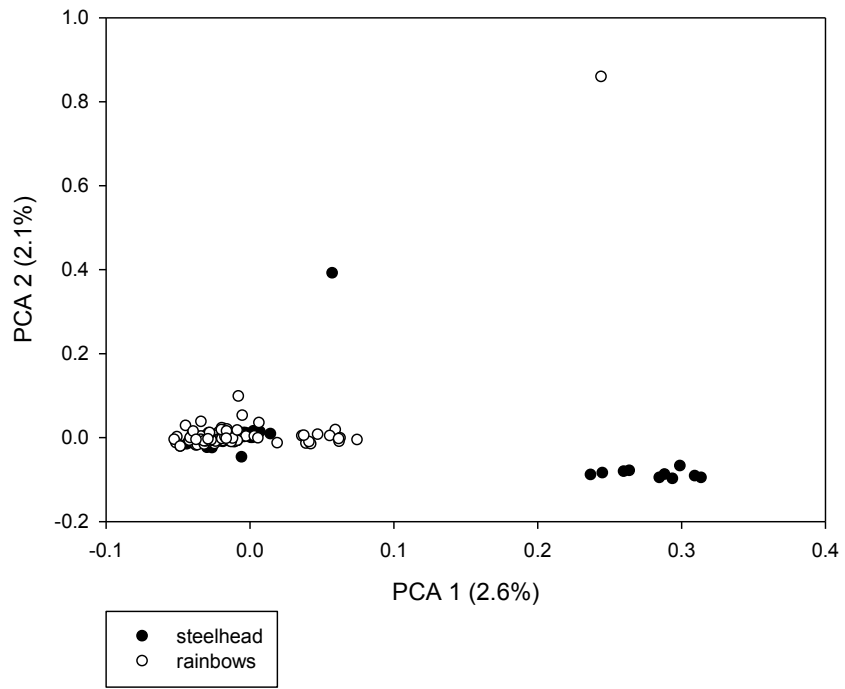

c

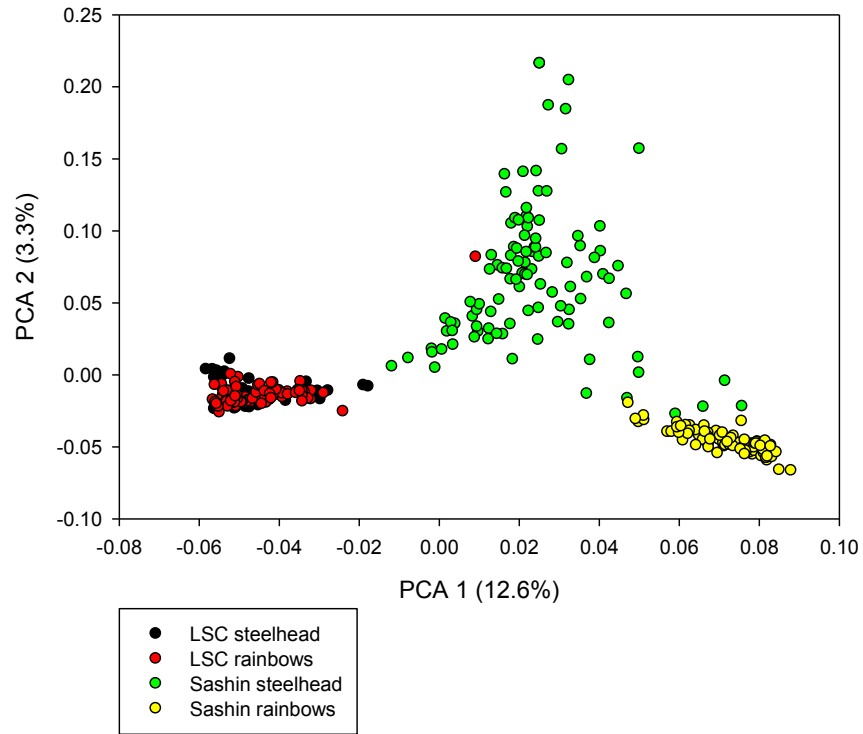

**Figure S2** GWAS results for markers that mapped to two linkage maps of the *O. mykiss* genome (Miller *et al.* 2012; Hecht *et al.* 2012 a). The red line marks significance with an FDR correction of 0.001 and the green line significance with an FDR corrected P of 0.05. The kernel smoothed average is used for all markers and chromosomes are alternatively shaded. Plots represent GWAS results from A) Sashin Creek binary, B) Sashin Creek fork length and C) Little Sheep Creek fork length.

A

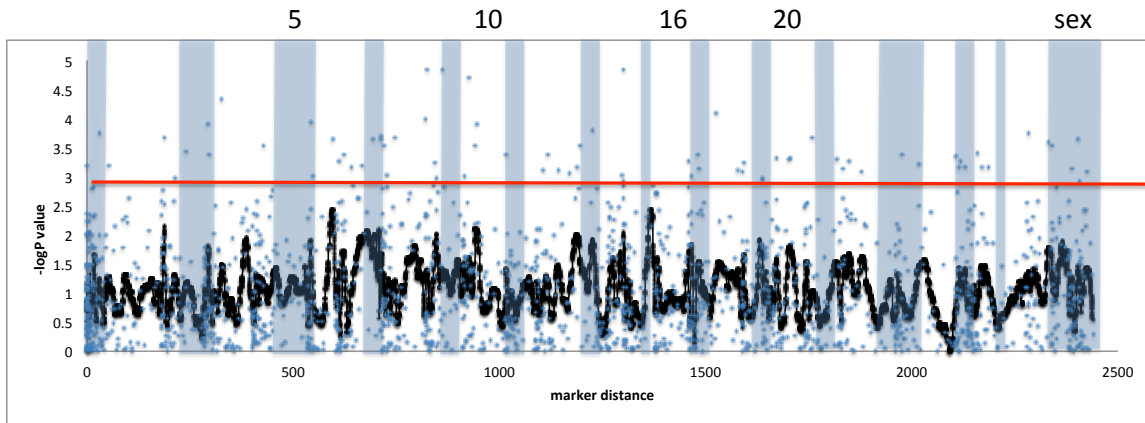

B

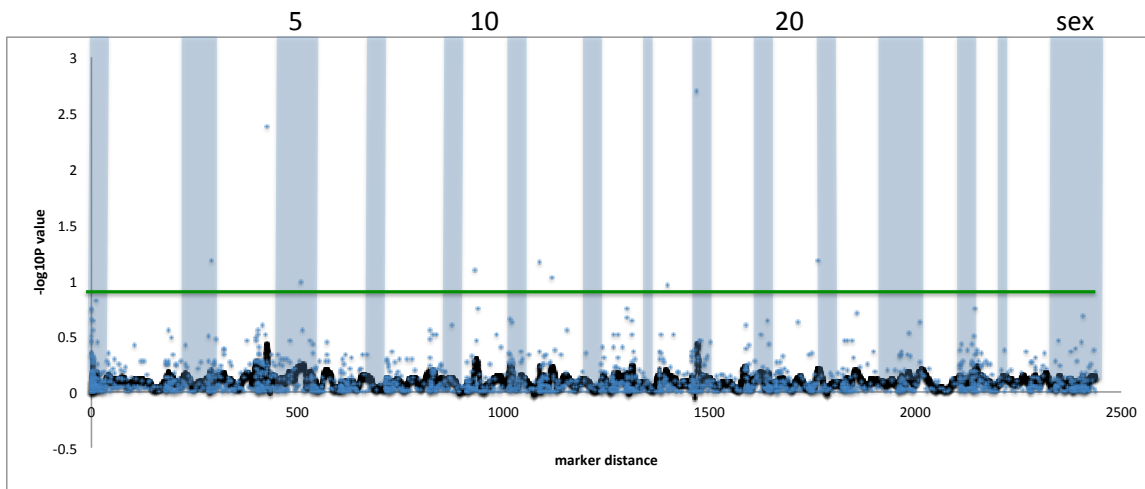



c

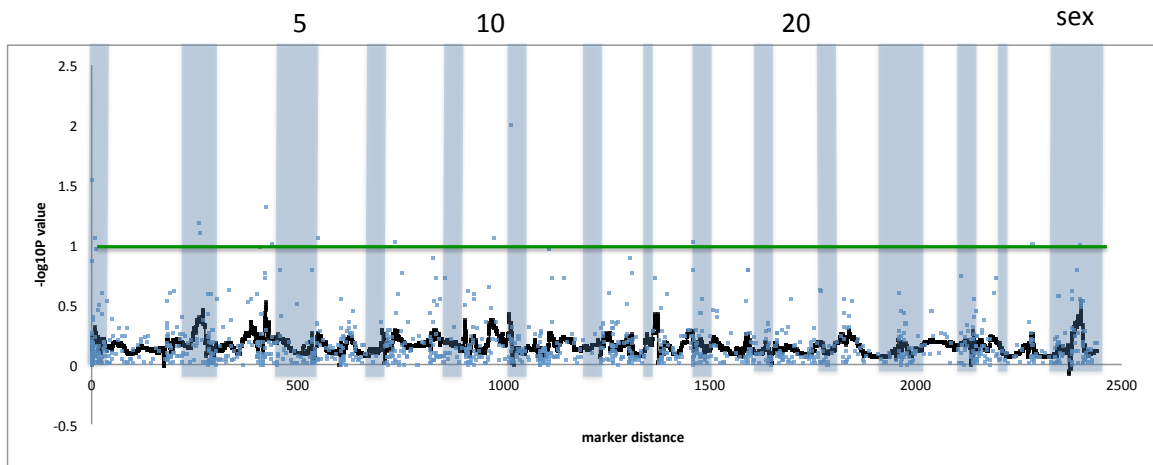

**Figure S3** Q-Q plots for each of the GWAS models performed a) Sashin Creek binary GWAS, b) Sashin Creek fork length GWAS, c) Little Sheep Creek GWAS.

**A**

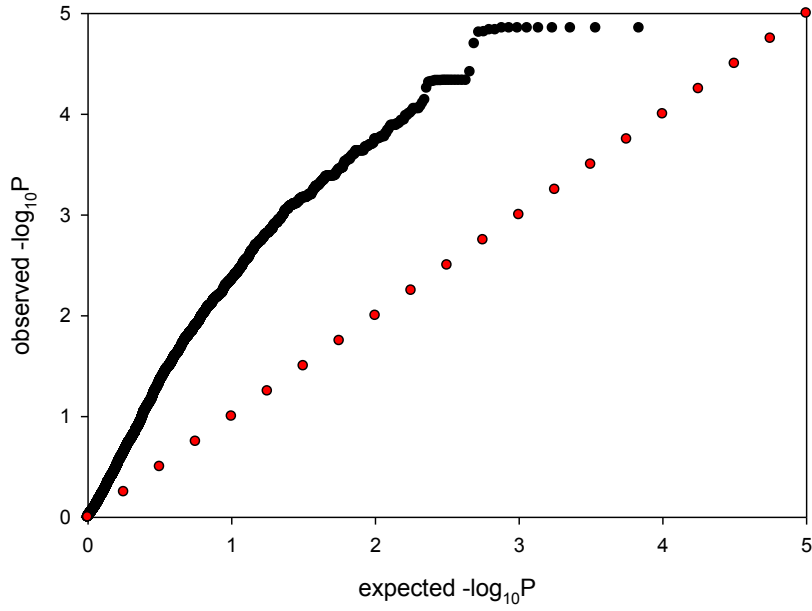

**B**

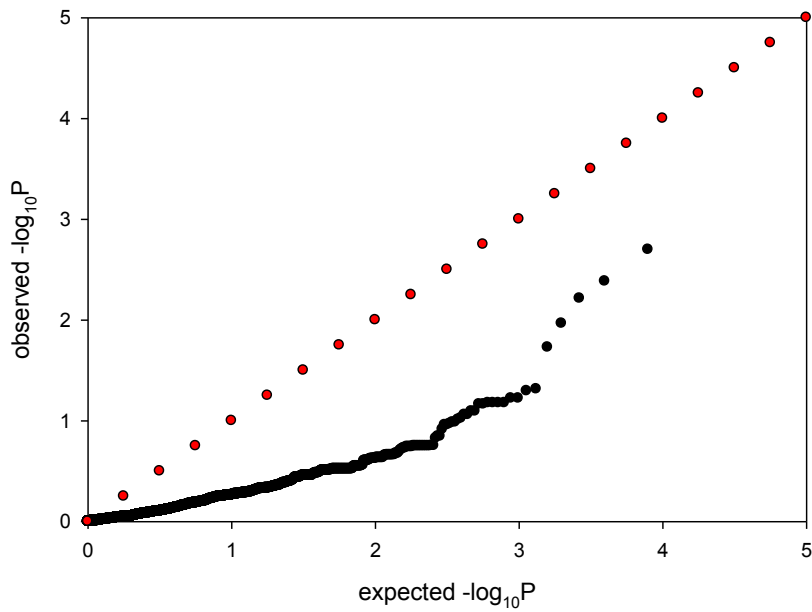

c

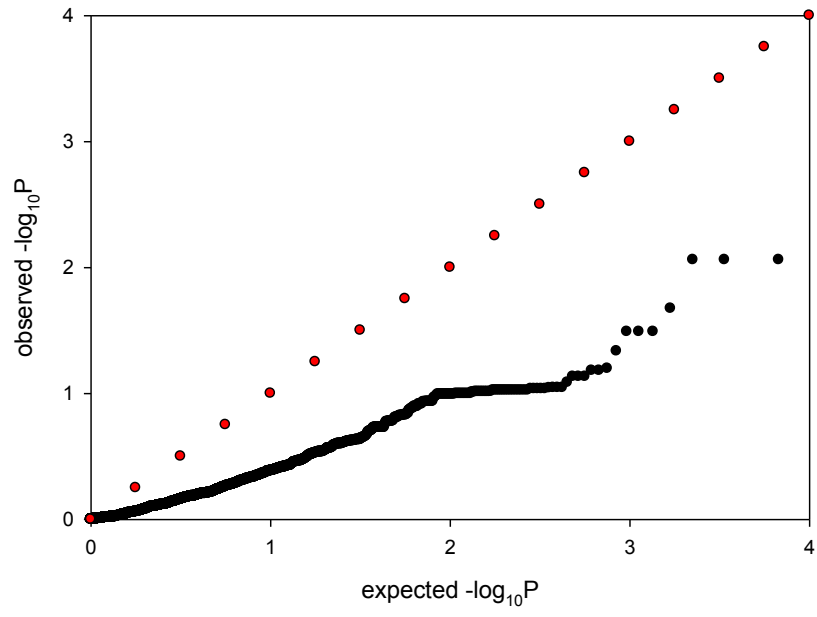

Supplement: supp_g3.113.006817_FileS5.pdf [file supp_g3.113.006817_FileS5.pdf]
