# Supplementary material for: Evaluating Adaptive Divergence Between Migratory and Nonmigratory Ecotypes of a Salmonid Fish, Oncorhynchus mykiss
Source: PubMed Central journal article supplement (PMC3737167; doi:10.1534/g3.113.006817), 2013-08-01
Supplement: supp_g3.113.006817_FileS1.pdf [file supp_g3.113.006817_FileS1.pdf]

File S1

Reads per individual from Illumina RADseq

Sequencing statistics for Illumina RADseq. Columns include the sequencing chemistry (both Illumina HiSeq and HiScanSeq were used), the number of individuals pooled per library, the raw number of reads (in millions) the number of quality filtered targeted reads (in millions) and the average number of quality filtered reads per individual (in millions).

| library name | chemistry | raw number of reads (million reads) | number of individuals | target QF sequences (million reads) | average QF sequences per individual (million reads) |
|--------------|-----------|-------------------------------------|-----------------------|-------------------------------------|-----------------------------------------------------|
| LSC_SH_4     | HiScan    | 82.4                                | 15                    | 54.8                                | 3.55                                                |
| LSC_RT_5     | HiScan    | 78                                  | 15                    | 43.3                                | 2.89                                                |
| LSC_RT_6     | HiScan    | 78                                  | 15                    | 39.7                                | 2.65                                                |
| SAS_SH_3     | HiScan    | 99.4                                | 15                    | 15.9                                | 10.70                                               |
| LSC_RT_3     | HiSeq     | 204.9                               | 20                    | 45.3                                | 2.27                                                |
| LSC_SH_3     | HiSeq     | 205.4                               | 15                    | 18.9                                | 1.26                                                |
| SAS_SH_3     | HiSeq     | 82.2                                | 15                    | 24.4                                | 1.60                                                |
| SAS_RT_3     | HiSeq     | 132                                 | 15                    | 58                                  | 3.87                                                |
| SAS_Sh2      | HiSeq     | 89.7                                | 10                    | 70.7                                | 7.10                                                |
| LSC_SH2      | HiSeq     | 90                                  | 10                    | 74.5                                | 7.40                                                |
| SAS_SH8      | HiScan    | 77.8                                | 15                    | 45.1                                | 3.00                                                |
| SAS_SH9      | HiScan    | 73.4                                | 15                    | 47.2                                | 3.10                                                |
| SAS_SH10     | HiScan    | 89.5                                | 15                    | 51.9                                | 3.50                                                |
| LSC_SH6      | HiScan    | 75.7                                | 15                    | 23.6                                | 1.60                                                |
| LSC_SH7      | HiScan    | 84.7                                | 15                    | 27.8                                | 1.90                                                |
| LSC_SH8      | HiScan    | 78.9                                | 15                    | 44.9                                | 3.00                                                |
| LSC_RT7      | HiScan    | 86.8                                | 15                    | 41                                  | 2.70                                                |
| LSC_RT11     | HiScan    | 88.4                                | 15                    | 56.3                                | 3.75                                                |
| lsc_rt12     | HiScan    | 58.3                                | 15                    | 39.3                                | 2.62                                                |
| lsc_rt9      | HiScan    | 81.9                                | 15                    | 44.9                                | 2.99                                                |
| lsc_sh11     | HiScan    | 83.4                                | 15                    | 37.9                                | 2.53                                                |
| lsc_sh12     | HiScan    | 76.1                                | 15                    | 33.1                                | 2.21                                                |
| SAS_RT11     | HiScan    | 80.1                                | 15                    | 51.1                                | 3.41                                                |
| SAS_RT12     | HiScan    | 35.7                                | 15                    | 19.6                                | 1.31                                                |
| sas_sh11     | HiScan    | 68.1                                | 15                    | 12.03                               | 0.80                                                |
| sas_sh12     | HiScan    | 69.1                                | 15                    | 20.6                                | 1.37                                                |
